**AUTHOR CORRECTION**

For the article by Eisenach in the July 1999 issue of *ANESTHESIOLOGY* (1999; 91:299-302), the author would like to make the following correction:

In the third paragraph of the article, the sentence beginning on the eighth line should read, "Sufentanil is approximately five times more potent than fentanyl for spinal or epidural analgesia, and the most commonly used doses are 5-10  $\mu\text{g}$  sufentanil or 20-35  $\mu\text{g}$  fentanyl."

**ANNOUNCEMENT****PAIN MANAGEMENT CERTIFICATION AND RECERTIFICATION EXAMINATION**

The American Board of Anesthesiology (ABA) will administer its PAIN MANAGEMENT examination *via* computer at more than 200 test centers on Saturday, September 9, 2000. The ABA will inform candidates of the test sites when the list is available. All applicants for initial certification in the subspecialty must satisfactorily complete 1 year of training in a pain management program accredited by the Residence Review Committee for Anesthesiology by August 31, 2000; they also must be certified in anesthesiology by the ABA or scheduled for ABA oral examination in 2000. Physicians whose ABA pain management certificate soon will expire may apply to maintain their subspecialty certification. The application for pain management certification or recertification may be downloaded from the ABA website ([www.ABANES.org](http://www.ABANES.org)) or obtained upon written request to the ABA at 4101 Lake Boone Trail, Suite 510, Raleigh, North Carolina 27607-7506. The ABA must receive your completed pain management application by March 1, 2000.
